# Supplementary material for: Functional and RNA-Sequencing Analysis Revealed Expression of a Novel Stay-Green Gene from Zoysia japonica (ZjSGR) Caused Chlorophyll Degradation and Accelerated Senescence in Arabidopsis
Source: Front Plant Sci. 2016 Dec 16;7:1894. doi: 10.3389/fpls.2016.01894 (PMC5159421; doi:10.3389/fpls.2016.01894)
Supplement: Table S6 — TFs analysis lists. [file Table6.XLSX]

## Sheet: TFs analysis
TFs analysis
tf_ID	Family	Type	Hyperlink	Blast swiss prot
AT1G01520_0	MYB	transcription factor	http://planttfdb.cbi.pku.edu.cn/family.php?fam=MYB	sp|Q6R0H0|RVE3_ARATH Protein REVEILLE 3 OS=Arabidopsis thaliana GN=RVE3 PE=2 SV=1//0
AT1G02220_2	NAC	transcription factor	http://planttfdb.cbi.pku.edu.cn/family.php?fam=NAC	sp|Q5PP28|NAC3_ARATH NAC domain-containing protein 3 OS=Arabidopsis thaliana GN=NAC003 PE=2 SV=1//0
AT1G02230_1	NAC	transcription factor	http://planttfdb.cbi.pku.edu.cn/family.php?fam=NAC	sp|O81913|NAC4_ARATH NAC domain-containing protein 4 OS=Arabidopsis thaliana GN=NAC004 PE=2 SV=2//0
AT1G02340_0	bHLH	transcription factor	http://planttfdb.cbi.pku.edu.cn/family.php?fam=bHLH	sp|Q9FE22|HFR1_ARATH Transcription factor HFR1 OS=Arabidopsis thaliana GN=HFR1 PE=1 SV=1//0
AT1G02580_1	SET	transcriptional regulator	--	sp|O65312|MEDEA_ARATH Histone-lysine N-methyltransferase MEDEA OS=Arabidopsis thaliana GN=MEA PE=1 SV=1//0
AT1G04240_1	AUX/IAA	transcriptional regulator	--	sp|Q38822|IAA3_ARATH Auxin-responsive protein IAA3 OS=Arabidopsis thaliana GN=IAA3 PE=1 SV=1//1.36908e-136
AT1G18860_2	WRKY	transcription factor	http://planttfdb.cbi.pku.edu.cn/family.php?fam=WRKY	sp|Q8VWV6|WRK61_ARATH Probable WRKY transcription factor 61 OS=Arabidopsis thaliana GN=WRKY61 PE=2 SV=1//0
AT1G21000_2	PLATZ	transcription factor	--	-//-
AT1G25560_2	AP2-EREBP	transcription factor	--	sp|Q9C6M5|RAVL1_ARATH AP2/ERF and B3 domain-containing transcription repressor TEM1 OS=Arabidopsis thaliana GN=TEM1 PE=1 SV=1//0
AT1G48000_2	MYB	transcription factor	http://planttfdb.cbi.pku.edu.cn/family.php?fam=MYB	sp|Q9LDE1|MY108_ARATH Transcription factor MYB108 OS=Arabidopsis thaliana GN=MYB108 PE=1 SV=1//2.26182e-70
AT1G52830_1	AUX/IAA	transcriptional regulator	--	sp|Q38824|IAA6_ARATH Auxin-responsive protein IAA6 OS=Arabidopsis thaliana GN=IAA6 PE=1 SV=2//1.12463e-115
AT1G62300_1	WRKY	transcription factor	http://planttfdb.cbi.pku.edu.cn/family.php?fam=WRKY	sp|Q9C519|WRKY6_ARATH WRKY transcription factor 6 OS=Arabidopsis thaliana GN=WRKY6 PE=1 SV=1//0
AT1G66600_2	WRKY	transcription factor	http://planttfdb.cbi.pku.edu.cn/family.php?fam=WRKY	sp|Q9C6H5|WRK63_ARATH Probable WRKY transcription factor 63 OS=Arabidopsis thaliana GN=WRKY63 PE=2 SV=1//0
AT1G69490_1	NAC	transcription factor	http://planttfdb.cbi.pku.edu.cn/family.php?fam=NAC	sp|O49255|NAC29_ARATH NAC transcription factor 29 OS=Arabidopsis thaliana GN=NAC029 PE=2 SV=1//0
AT1G70700_0	Tify	transcription factor	--	sp|Q8W4J8|TIF7_ARATH Protein TIFY 7 OS=Arabidopsis thaliana GN=TIFY7 PE=1 SV=2//0
AT1G71030_0	MYB	transcription factor	http://planttfdb.cbi.pku.edu.cn/family.php?fam=MYB	sp|Q9S9K9|MYB3_ARATH Transcription factor MYB3 OS=Arabidopsis thaliana GN=MYB3 PE=1 SV=1//6.45878e-30
AT1G75490_0	AP2-EREBP	transcription factor	--	sp|Q9LQZ2|DRE2D_ARATH Dehydration-responsive element-binding protein 2D OS=Arabidopsis thaliana GN=DREB2D PE=2 SV=1//3.12052e-118
AT1G76590_1	PLATZ	transcription factor	--	-//-
AT2G18300_2	bHLH	transcription factor	http://planttfdb.cbi.pku.edu.cn/family.php?fam=bHLH	sp|Q9ZPW3|HBI1_ARATH Transcription factor HBI1 OS=Arabidopsis thaliana GN=HBI1 PE=1 SV=3//0
AT2G18328_1	MYB	transcription factor	http://planttfdb.cbi.pku.edu.cn/family.php?fam=MYB	sp|Q1G3C4|RADL4_ARATH Protein RADIALIS-like 4 OS=Arabidopsis thaliana GN=RL4 PE=2 SV=1//2.8824e-40
AT2G23320_2	WRKY	transcription factor	http://planttfdb.cbi.pku.edu.cn/family.php?fam=WRKY	sp|O22176|WRK15_ARATH Probable WRKY transcription factor 15 OS=Arabidopsis thaliana GN=WRKY15 PE=2 SV=1//1.5886e-168
AT2G30250_1	WRKY	transcription factor	http://planttfdb.cbi.pku.edu.cn/family.php?fam=WRKY	sp|O22921|WRK25_ARATH Probable WRKY transcription factor 25 OS=Arabidopsis thaliana GN=WRKY25 PE=1 SV=1//0
AT2G32020_0	GNAT	transcriptional regulator	--	sp|P05332|YP20_BACLI Uncharacterized N-acetyltransferase p20 OS=Bacillus licheniformis GN=p20 PE=3 SV=1//1.6116e-20
AT2G32100_0	OFP	transcription factor	--	sp|Q9SKY9|OFP16_ARATH Transcription repressor OFP16 OS=Arabidopsis thaliana GN=OFP16 PE=2 SV=1//2.59116e-137
AT2G40750_0	WRKY	transcription factor	http://planttfdb.cbi.pku.edu.cn/family.php?fam=WRKY	sp|Q93WU8|WRK54_ARATH Probable WRKY transcription factor 54 OS=Arabidopsis thaliana GN=WRKY54 PE=2 SV=2//0
AT2G42380_0	bZIP	transcription factor	http://planttfdb.cbi.pku.edu.cn/family.php?fam=bZIP	sp|F4IN23|BZP34_ARATH Basic leucine zipper 34 OS=Arabidopsis thaliana GN=BZIP34 PE=1 SV=1//1.95135e-177
AT2G46270_0	bZIP	transcription factor	http://planttfdb.cbi.pku.edu.cn/family.php?fam=bZIP	sp|P42776|GBF3_ARATH G-box-binding factor 3 OS=Arabidopsis thaliana GN=GBF3 PE=1 SV=2//0
AT3G01080_0	WRKY	transcription factor	http://planttfdb.cbi.pku.edu.cn/family.php?fam=WRKY	sp|Q93WU7|WRK58_ARATH Probable WRKY transcription factor 58 OS=Arabidopsis thaliana GN=WRKY58 PE=2 SV=2//0
AT3G01970_1	WRKY	transcription factor	http://planttfdb.cbi.pku.edu.cn/family.php?fam=WRKY	sp|Q9S763|WRK45_ARATH Probable WRKY transcription factor 45 OS=Arabidopsis thaliana GN=WRKY45 PE=2 SV=1//3.08959e-89
AT3G02150_2	TCP	transcription factor	http://planttfdb.cbi.pku.edu.cn/family.php?fam=TCP	sp|Q9S7W5|TCP13_ARATH Transcription factor TCP13 OS=Arabidopsis thaliana GN=TCP13 PE=1 SV=1//0
AT3G04060_1	NAC	transcription factor	http://planttfdb.cbi.pku.edu.cn/family.php?fam=NAC	sp|Q9FLJ2|NC100_ARATH NAC domain-containing protein 100 OS=Arabidopsis thaliana GN=NAC100 PE=2 SV=1//2.54249e-87
AT3G04070_1	NAC	transcription factor	http://planttfdb.cbi.pku.edu.cn/family.php?fam=NAC	sp|A2YMR0|NAC10_ORYSI NAC transcription factor ONAC010 OS=Oryza sativa subsp. indica GN=ONAC010 PE=3 SV=1//6.28315e-79
AT3G23240_1	AP2-EREBP	transcription factor	--	sp|Q8LDC8|ERF92_ARATH Ethylene-responsive transcription factor 1B OS=Arabidopsis thaliana GN=ERF1B PE=1 SV=2//9.64492e-131
AT3G50260_0	AP2-EREBP	transcription factor	--	sp|Q9SNE1|ERF11_ARATH Ethylene-responsive transcription factor ERF011 OS=Arabidopsis thaliana GN=ERF011 PE=2 SV=1//7.54306e-95
AT3G56400_0	WRKY	transcription factor	http://planttfdb.cbi.pku.edu.cn/family.php?fam=WRKY	sp|Q9LY00|WRK70_ARATH Probable WRKY transcription factor 70 OS=Arabidopsis thaliana GN=WRKY70 PE=2 SV=1//0
AT3G61890_2	HB	transcription factor	--	sp|Q9M276|ATB12_ARATH Homeobox-leucine zipper protein ATHB-12 OS=Arabidopsis thaliana GN=ATHB-12 PE=2 SV=1//1.03405e-143
AT4G05100_1	MYB	transcription factor	http://planttfdb.cbi.pku.edu.cn/family.php?fam=MYB	sp|Q8GWP0|MYB39_ARATH Transcription factor MYB39 OS=Arabidopsis thaliana GN=MYB39 PE=2 SV=1//1.46288e-67
AT4G16110_2	ARR-B	transcription factor	http://planttfdb.cbi.pku.edu.cn/family.php?fam=ARR-B	sp|Q9ZWJ9|ARR2_ARATH Two-component response regulator ARR2 OS=Arabidopsis thaliana GN=ARR2 PE=1 SV=1//0
AT4G17500_2	AP2-EREBP	transcription factor	--	sp|O80337|EF100_ARATH Ethylene-responsive transcription factor 1A OS=Arabidopsis thaliana GN=ERF1A PE=1 SV=2//1.52203e-159
AT4G21440_0	MYB	transcription factor	http://planttfdb.cbi.pku.edu.cn/family.php?fam=MYB	sp|Q8GWP0|MYB39_ARATH Transcription factor MYB39 OS=Arabidopsis thaliana GN=MYB39 PE=2 SV=1//1.82452e-65
AT4G32280_2	AUX/IAA	transcriptional regulator	--	sp|Q93WC4|IAA29_ARATH Auxin-responsive protein IAA29 OS=Arabidopsis thaliana GN=IAA29 PE=2 SV=2//1.18352e-147
AT4G36570_0	MYB	transcription factor	http://planttfdb.cbi.pku.edu.cn/family.php?fam=MYB	sp|Q6NNN0|RADL3_ARATH Protein RADIALIS-like 3 OS=Arabidopsis thaliana GN=RL3 PE=2 SV=1//5.7109e-30
AT4G37610_2	TAZ	transcription factor	--	sp|Q6EJ98|BT5_ARATH BTB/POZ and TAZ domain-containing protein 5 OS=Arabidopsis thaliana GN=BT5 PE=1 SV=1//0
AT5G07100_2	WRKY	transcription factor	http://planttfdb.cbi.pku.edu.cn/family.php?fam=WRKY	sp|Q9C5T3|WRK26_ARATH Probable WRKY transcription factor 26 OS=Arabidopsis thaliana GN=WRKY26 PE=1 SV=2//4.33373e-15
AT5G08520_0	MYB	transcription factor	http://planttfdb.cbi.pku.edu.cn/family.php?fam=MYB	sp|Q8S9H7|DIV_ANTMA Transcription factor DIVARICATA OS=Antirrhinum majus GN=DIVARICATA PE=2 SV=1//3.45968e-53
AT5G08790_1	NAC	transcription factor	http://planttfdb.cbi.pku.edu.cn/family.php?fam=NAC	sp|Q9C598|NAC81_ARATH Protein ATAF2 OS=Arabidopsis thaliana GN=NAC081 PE=1 SV=1//0
AT5G24120_2	Sigma70-like	transcription factor	--	sp|Q9ZNX9|SIGE_ARATH RNA polymerase sigma factor sigE, chloroplastic/mitochondrial OS=Arabidopsis thaliana GN=SIGE PE=1 SV=1//0
AT5G39610_0	NAC	transcription factor	http://planttfdb.cbi.pku.edu.cn/family.php?fam=NAC	sp|Q9FKA0|NAC92_ARATH NAC domain-containing protein 92 OS=Arabidopsis thaliana GN=NAC92 PE=1 SV=1//0
AT5G39660_2	C2C2-Dof	transcription factor	--	sp|Q93ZL5|CDF2_ARATH Cyclic dof factor 2 OS=Arabidopsis thaliana GN=CDF2 PE=1 SV=2//0
AT5G46350_1	WRKY	transcription factor	http://planttfdb.cbi.pku.edu.cn/family.php?fam=WRKY	sp|Q9FL26|WRKY8_ARATH Probable WRKY transcription factor 8 OS=Arabidopsis thaliana GN=WRKY8 PE=1 SV=1//0
AT5G47220_0	AP2-EREBP	transcription factor	--	sp|O80338|EF101_ARATH Ethylene-responsive transcription factor 2 OS=Arabidopsis thaliana GN=ERF2 PE=2 SV=1//3.59475e-140
AT5G63160_2	TAZ	transcription factor	--	sp|Q9FMK7|BT1_ARATH BTB/POZ and TAZ domain-containing protein 1 OS=Arabidopsis thaliana GN=BT1 PE=1 SV=1//0
AT5G64810_2	WRKY	transcription factor	http://planttfdb.cbi.pku.edu.cn/family.php?fam=WRKY	sp|Q93WU9|WRK51_ARATH Probable WRKY transcription factor 51 OS=Arabidopsis thaliana GN=WRKY51 PE=1 SV=1//5.42082e-110
AT5G65080_2	MADS	transcription factor	--	sp|Q683D7|MAF5_ARATH Protein MADS AFFECTING FLOWERING 5 OS=Arabidopsis thaliana GN=MAF5 PE=2 SV=2//5.01886e-114
